# Supplementary material for: Two-dimensional fence-like Co-doped NiSe2/C nanosheets as an anode for half/full sodium-ion batteries
Source: Royal Society of Chemistry journal article supplement (doi:10.1039/d0qi01172j), 2020-10-26
Supplement: d0qi01172j1.pdf [file d0qi01172j1.pdf]

**Two-dimensional fence-like Co-doped NiSe<sub>2</sub>/C nanosheets as anode for half/full sodium-ion batteries**

Siwei Fan, Guangda Li\*, Jianyu Liu

School of Materials Science and Engineering, Qilu University of Technology  
(Shandong Academy of Sciences), Jinan250353, China

Corresponding author

E-mail: [ligd@qlu.edu.cn](mailto:ligd@qlu.edu.cn)

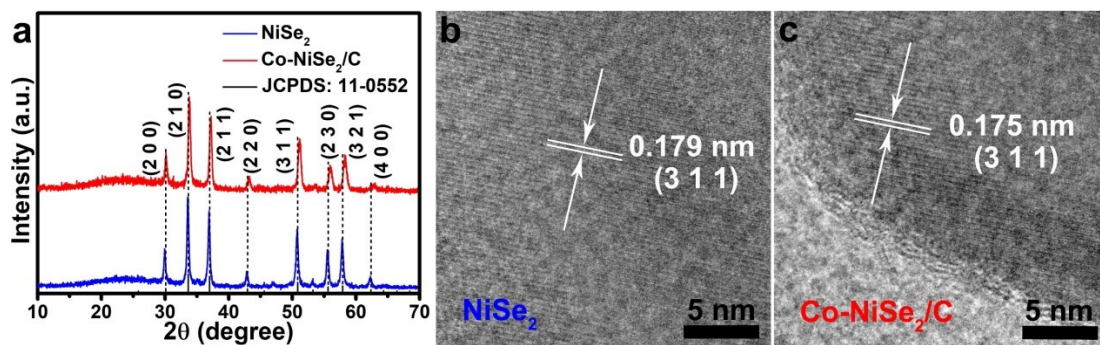

Fig. S1. (a) XRD patterns of  $\text{Co-NiSe}_2/\text{C}$ . Lattice fringes of  $\text{NiSe}_2$  (b) and  $\text{Co-NiSe}_2/\text{C}$  (c).

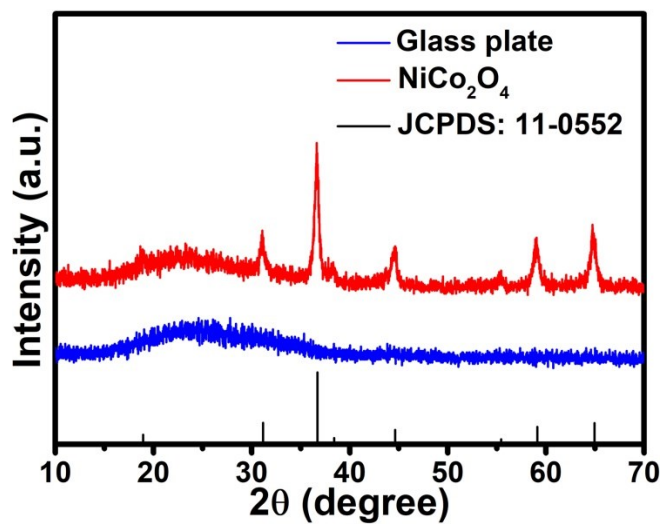

Fig. S2. XRD patterns of glass plate and  $\text{NiCo}_2\text{O}_4$ .

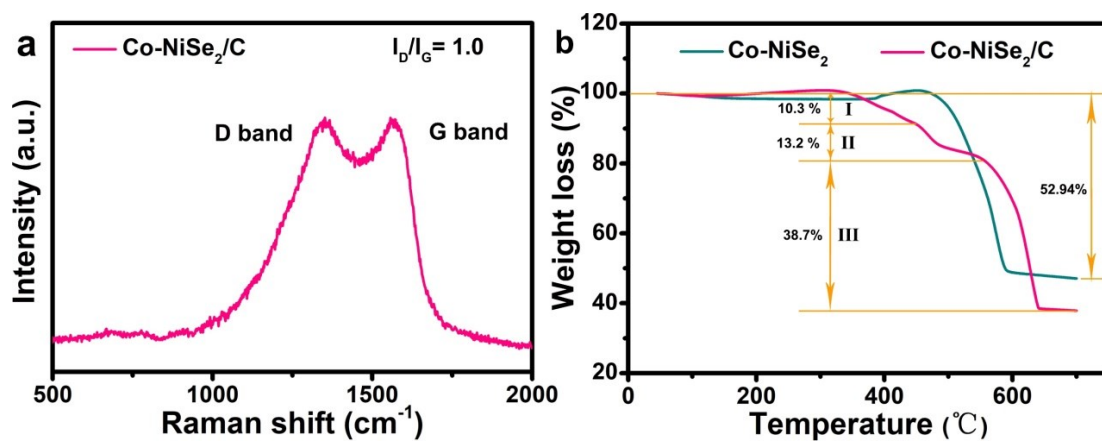

**Fig. S3.** The Raman spectra (a) of Co-NiSe<sub>2</sub>/C and TGA curves (b) of Co-NiSe<sub>2</sub> and Co-NiSe<sub>2</sub>/C.

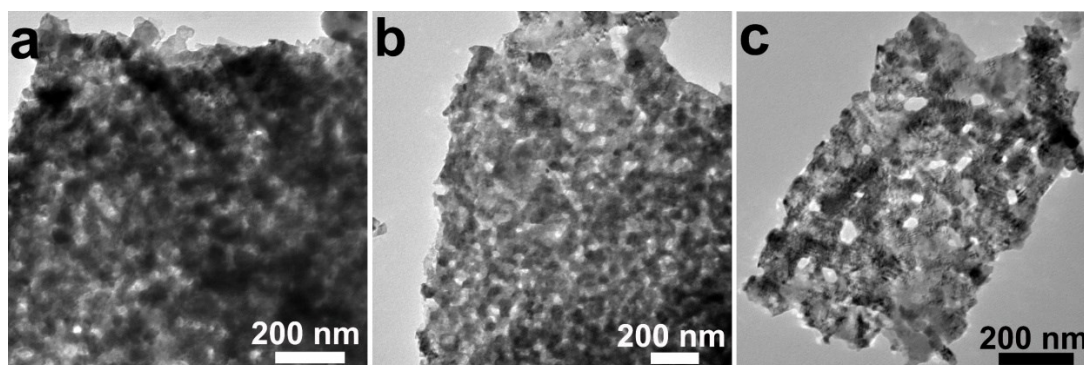

**Fig. S4.** TEM images of Co-NiSe<sub>2</sub>/C after 60 (a), 200 (b) and 1000 (c) cycles.

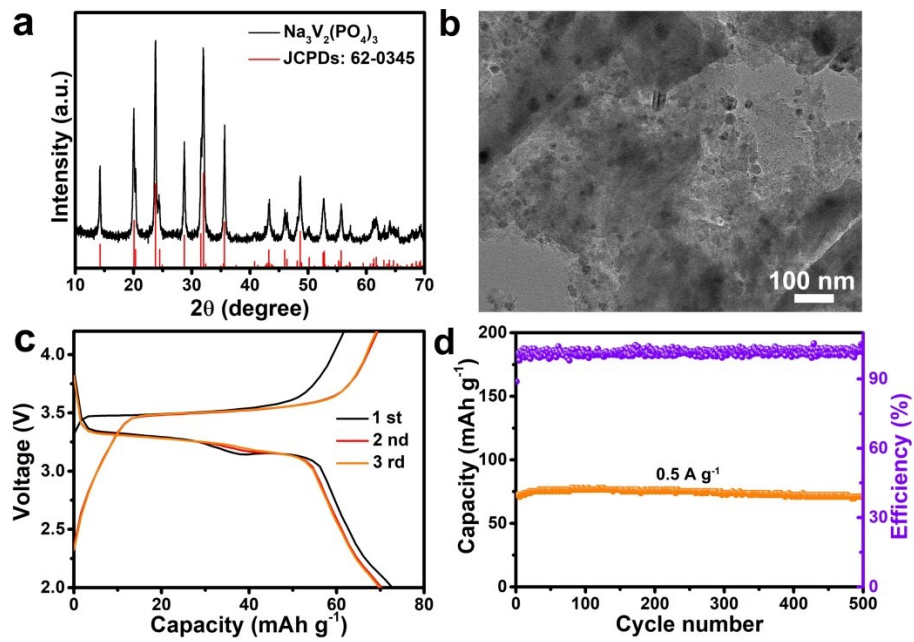

**Fig. S5.** XRD pattern (a), TEM image (b), discharge/charge curves (c) and cycling performance (d) of  $\text{Na}_3\text{V}_2(\text{PO}_4)_3$  at a current density of  $0.5 \text{ A g}^{-1}$ .

**Table S1.** Cycling performance of Co-NiSe<sub>2</sub>/C and full-cell reported in previous works.

| <b>Typical materials</b>                      | <b>Capacity (mAh g<sup>-1</sup>)</b> | <b>Current (A g<sup>-1</sup>)</b> | <b>Cycle number</b> | <b>Full cell performance</b>                                   | <b>Ref.</b> |
|-----------------------------------------------|--------------------------------------|-----------------------------------|---------------------|----------------------------------------------------------------|-------------|
| <b>Nanobox CoSe<sub>2</sub>@C</b>             | 234 mAh g <sup>-1</sup>              | 5                                 | 2000                | -                                                              | 1           |
| <b>Urchin Like CoSe<sub>2</sub></b>           | 410                                  | 1                                 | 1800                | 372 mAh g <sup>-1</sup> (0.5 A g <sup>-1</sup> , 50 cycles)    | 2           |
| <b>Cobblestone Like CoSe<sub>2</sub>@C</b>    | 345                                  | 4.5                               | 10000               | -                                                              | 3           |
| <b>CoSe<sub>2</sub> nanorods</b>              | 386                                  | 5                                 | 2000                | -                                                              | 4           |
| <b>CoSe<sub>2</sub>/ZnSe nanoflakes</b>       | 200                                  | 10                                | 4000                | 130 mAh g <sup>-1</sup> (1 A g <sup>-1</sup> , 800 cycles)     | 5           |
| <b>MoSe<sub>2</sub>@CoSe/N</b>                | 347                                  | 2                                 | 300                 | 197 mAh g <sup>-1</sup> (2 A g <sup>-1</sup> , 100 cycles)     | 6           |
| <b>Porous Ni-CoSe<sub>2</sub> nanospheres</b> | 316                                  | 10                                | 8000                | 208.3 mAh g <sup>-1</sup> (0.5 A g <sup>-1</sup> , 70 cycles)  | 7           |
| <b>Fence-like Co-NiSe<sub>2</sub>/C</b>       | 306.1                                | 5                                 | 5000                | 269.1 mAh g <sup>-1</sup> (0.5 A g <sup>-1</sup> , 100 cycles) | This work   |

- [1] B. Q. Li, Y. Liu, X. Jin, S. H. Jiao, G. G. Wang, B. Peng, S. Y. Zeng, L. Shi, J. M. Li and G. Q. Zhang, *Small*, 2019, 15, 1902881.
- [2] K. Zhang, M. Park, L. M. Zhou, G. Lee, W. J. Li, Y. M. Kang and J. Chen, *Adv. Funct. Mater.*, 2016, 26, 6728.
- [3] P. Ge, H. S. Hou, S. J. Li, L. P. Huang and X. B. Ji, *ACS Appl. Mater. Interfaces*, 2018, 10, 14716.
- [4] X. Ou, X. H. Liang, F. H. Zheng, P. Wu, Q.C. Pan, X. H. Xiong, C. H. Yang and M. L. Liu, *Electrochim. Acta*, 2017, 258, 1387.
- [5] G. Z. Fang, Q. C. Wang, J. Zhou, Y. P. Lei, Z. X. Chen, Z. Q. Wang, A. Q. Pan and S. Q. Liang, *ACS Nano*, 2019, 13, 5635.
- [6] J. Chen, A. Q. Pan, Y. P. Wang, X. X. Cao, W. C. Zhang, X. Z. Kong, Q. Su, J. D. Lin, G. Cao and S. Liang, *Energy Storage Mater.*, 2019, 21, 97.
- [7] S. W. Fan, G. D. Li, F. P. Cai, G. Yang, *Chem. Eur. J.* 2020, 26, 8579 – 8587.
